# Supplementary material
Source: PubMed Central journal article supplement (PMC6494460)
Supplement: NIHMS1523532-supplement-1.pdf [file NIHMS1523532-supplement-1.pdf]

# Supplementary Figure 1

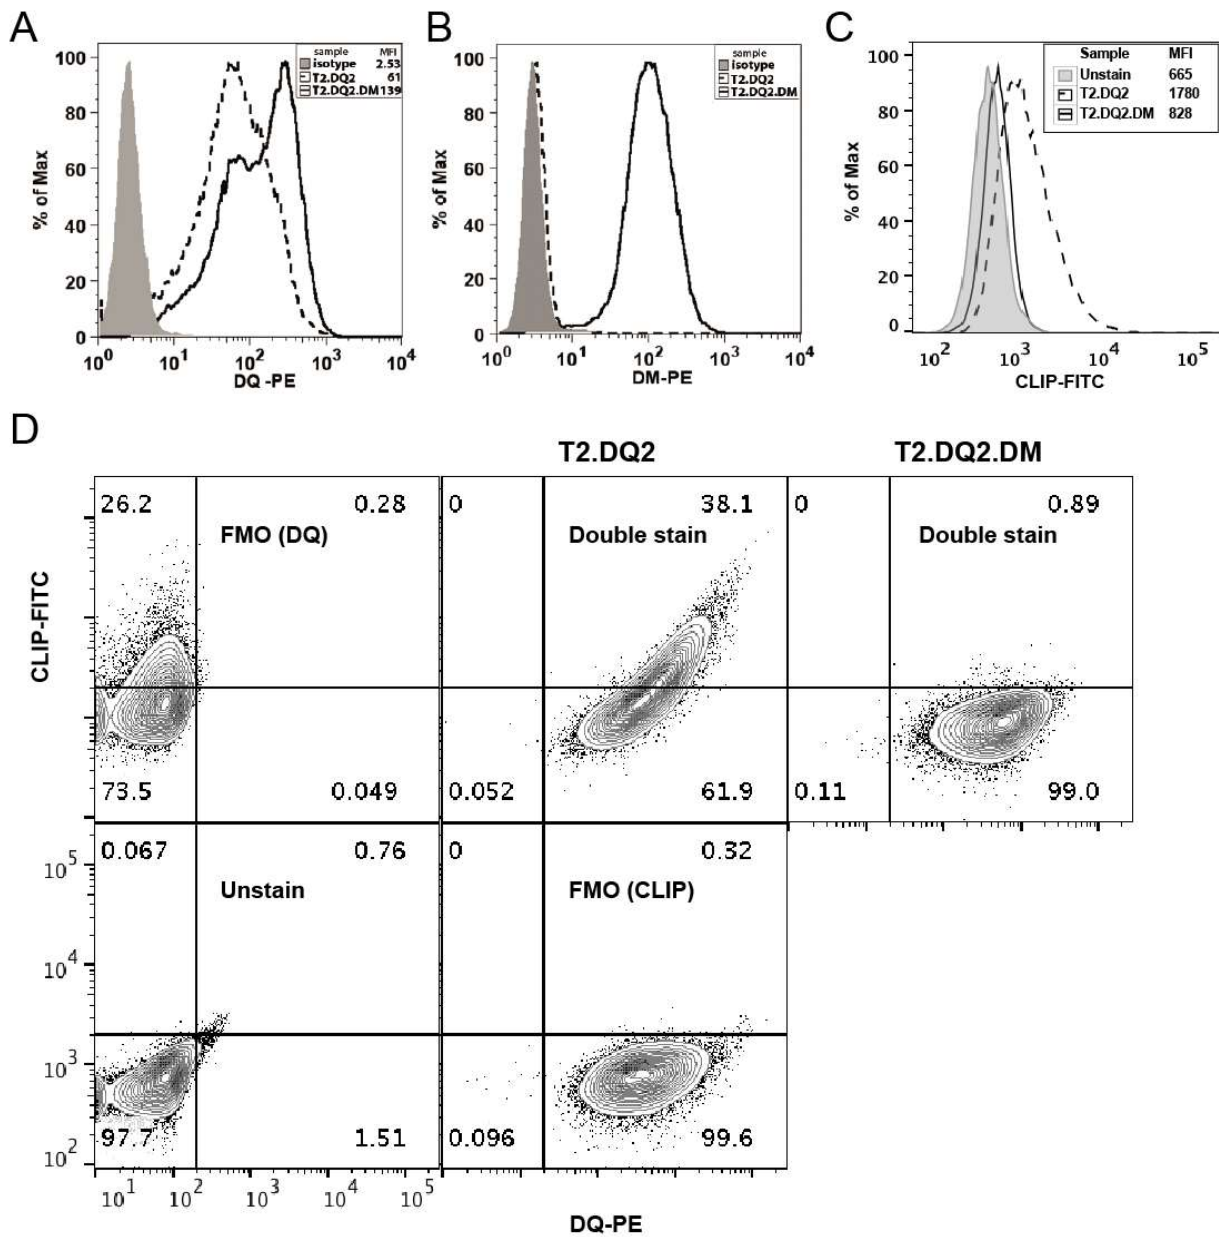

**Supplementary Figure 1. Effects of DM on DQ2 and surface DQ2/CLIP1 levels in cells. (A-C)** Expression of DQ, DM, and CLIP/DQ2 in T2.DQ2 and T2.DQ2.DM cells. T2.DQ2 and T2.DQ2.DM cells were surface-stained with PE-conjugated mouse anti-human DQ (Ia3; DQ-PE)

(A) or permeabilized and stained with PE-conjugated mouse anti-human DM (MaP.DM1; DM-PE) (B) or surface-stained with FITC-conjugated mouse anti-human CLIP (CerCLIP.1; CLIP-FITC) (C) followed by flow cytometry. (D) Co-staining of T2.DQ2 and T2.DQ2.DM cells with DQ-PE and CLIP-FITC. The unstained sample, FMO (DQ-PE) and FMO (CLIP-FITC), respectively, of T2.DQ2 cells were used as controls. mAb CerCLIP.1 recognizes CLIP1 (~aa 81-103), but not CLIP2 (~aa 93-108) (71), in complex with MHCII. DQ2 proteins in T2.DQ2 also are associated with CLIP2 peptides (17, 72). However, DM-mediated peptide replacement is not limited to a particular CLIP peptide, as most CLIP peptides are absent in the pulse-chase assay (Figure 1).

## Supplementary Figure 2

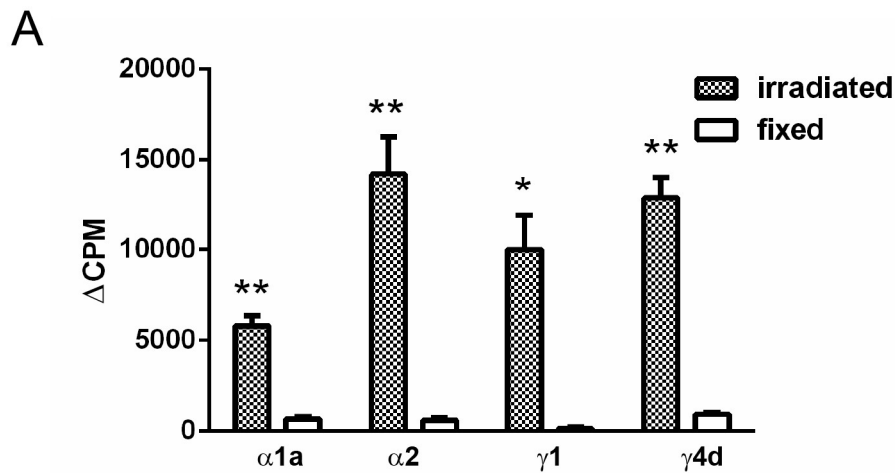

### Supplementary Figure 2. Presentation of PT-gluten requires intracellular processing.

T2.DQ2 cells were either irradiated or fixed before being added to  $\alpha$ 1a,  $\alpha$ 2,  $\gamma$ 1, or  $\gamma$ 4d specific-T cell clones (TCC819.392, TCC820.250, TCC820.270, or TCC820.59, respectively) with or without transglutaminase-treated PT-gluten. [ $^3$ H]-thymidine incorporation and measurement was performed as described in Figure 2.

# Supplementary Figure 3

## A H1N1

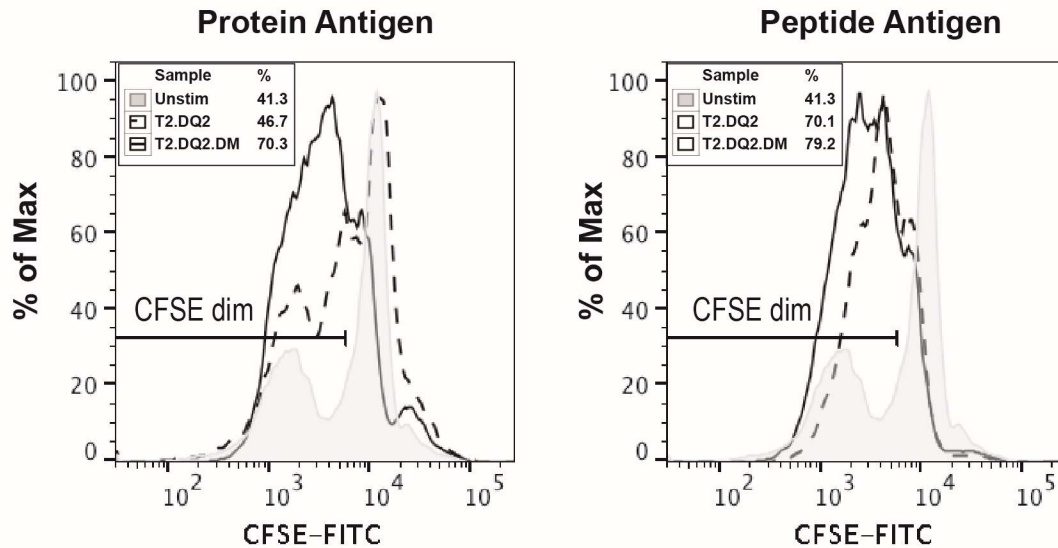

## B HPV16

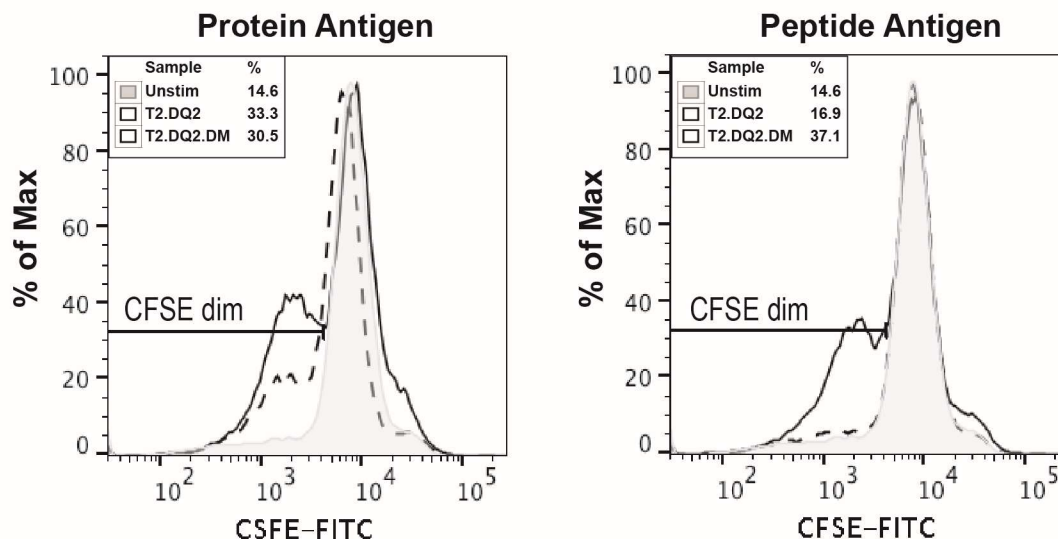

**Supplementary Figure 3. Representative flow cytometric data for CFSE staining.** (A) H1N1- and (B) HPV- specific T cell clones were labelled with CFSE and stimulated by (A) recombinant HA proteins or HA<sub>97-113</sub> peptide derived from H1N1 and (B) recombinant E7

protein or E7<sub>22-56</sub> peptide derived from HPV16, respectively. Shown are overlays of histograms representing unstimulated, antigen/T2.DQ2-stimulated or antigen/T2.DQ2.DM-stimulated samples with % of CFSE dim cells indicated.

# Supplementary Table 1

List of gliadin peptides used and the corresponding T cell clones

| Epitope     | Nomenclature            | Peptide used for each epitope (epitope bold)                                                         | Corresponding T cell clone |
|-------------|-------------------------|------------------------------------------------------------------------------------------------------|----------------------------|
| $\alpha$ 1a | DQ2.5-glia- $\alpha$ 1a | $\alpha$ -glia ( $\alpha$ 1/ $\alpha$ 2): LQLQ <b>PFQPELPYPQPELPY</b><br>P1269: QLQ <b>PFQPELPY</b>  | TCC819.392                 |
| $\alpha$ 2  | DQ2.5-glia- $\alpha$ 2  | $\alpha$ -glia ( $\alpha$ 1/ $\alpha$ 2): LQLQ <b>PFQPELPYPQPELPY</b><br>PS1200: <b>PQPELPYPQPQS</b> | TCC820.250                 |
| $\gamma$ 1  | DQ2.5-glia- $\gamma$ 1  | P1213: pyroEPEQ <b>PQQSFPEQERP</b>                                                                   | TCC820.270                 |
| $\gamma$ 4d | DQ2.5-glia- $\gamma$ 4d | P1936: <b>PFQPEQPFCEQPQR</b>                                                                         | TCC820.59                  |

This table is adapted from (35).
